# Supplementary material for: Studies on the GFP-tagged receptor or β-arrestin2 in U2OS cells reveal two separate signaling pathways of purinergic P2Y1 receptors
Source: Royal Society of Chemistry journal article supplement (doi:10.1039/c9ay01807g), 2019-01-01
Supplement: c9ay01807g1.pdf [file c9ay01807g1.pdf]

Supplementary Material

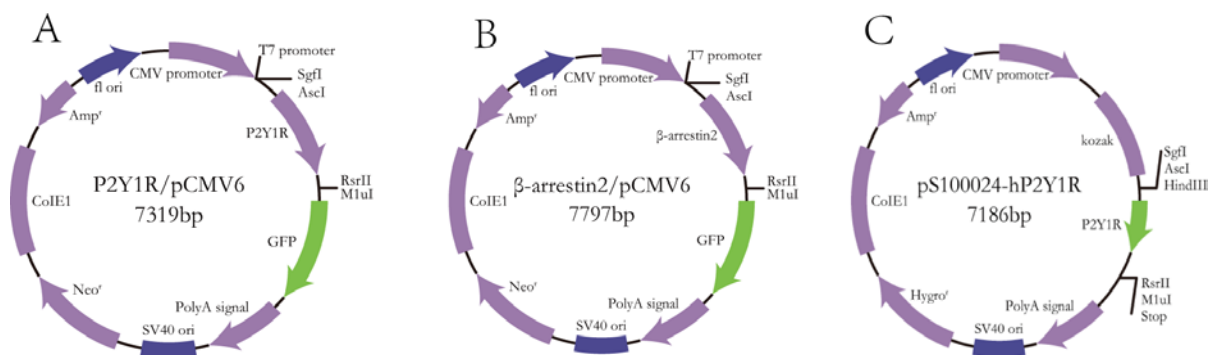

Fig. S1 The schematic strategy of construction of recombinant plasmids. (A) Encoding region of human P2Y1 receptor was inserted into the pCMV6 vector and tGFP was fused at C-terminus of the reading frame of P2Y1 receptor. (B) β-arrestin2 (βAR2) was inserted into the pCMV6 vector 2, and GFP was tagged at C-terminus of βAR2. (C) Encoding region of human P2Y1 receptor was inserted into the pS100024 vector.
